# Supplementary figures and images for: Technoeconomic Performance Analysis of Solar Tracking Methods for Roof-Type Solar Power Plants and Electric Vehicle Charging Stations
Source: Hindawi journal article supplement (doi:10.1155/2021/6681084), 2021-04-06

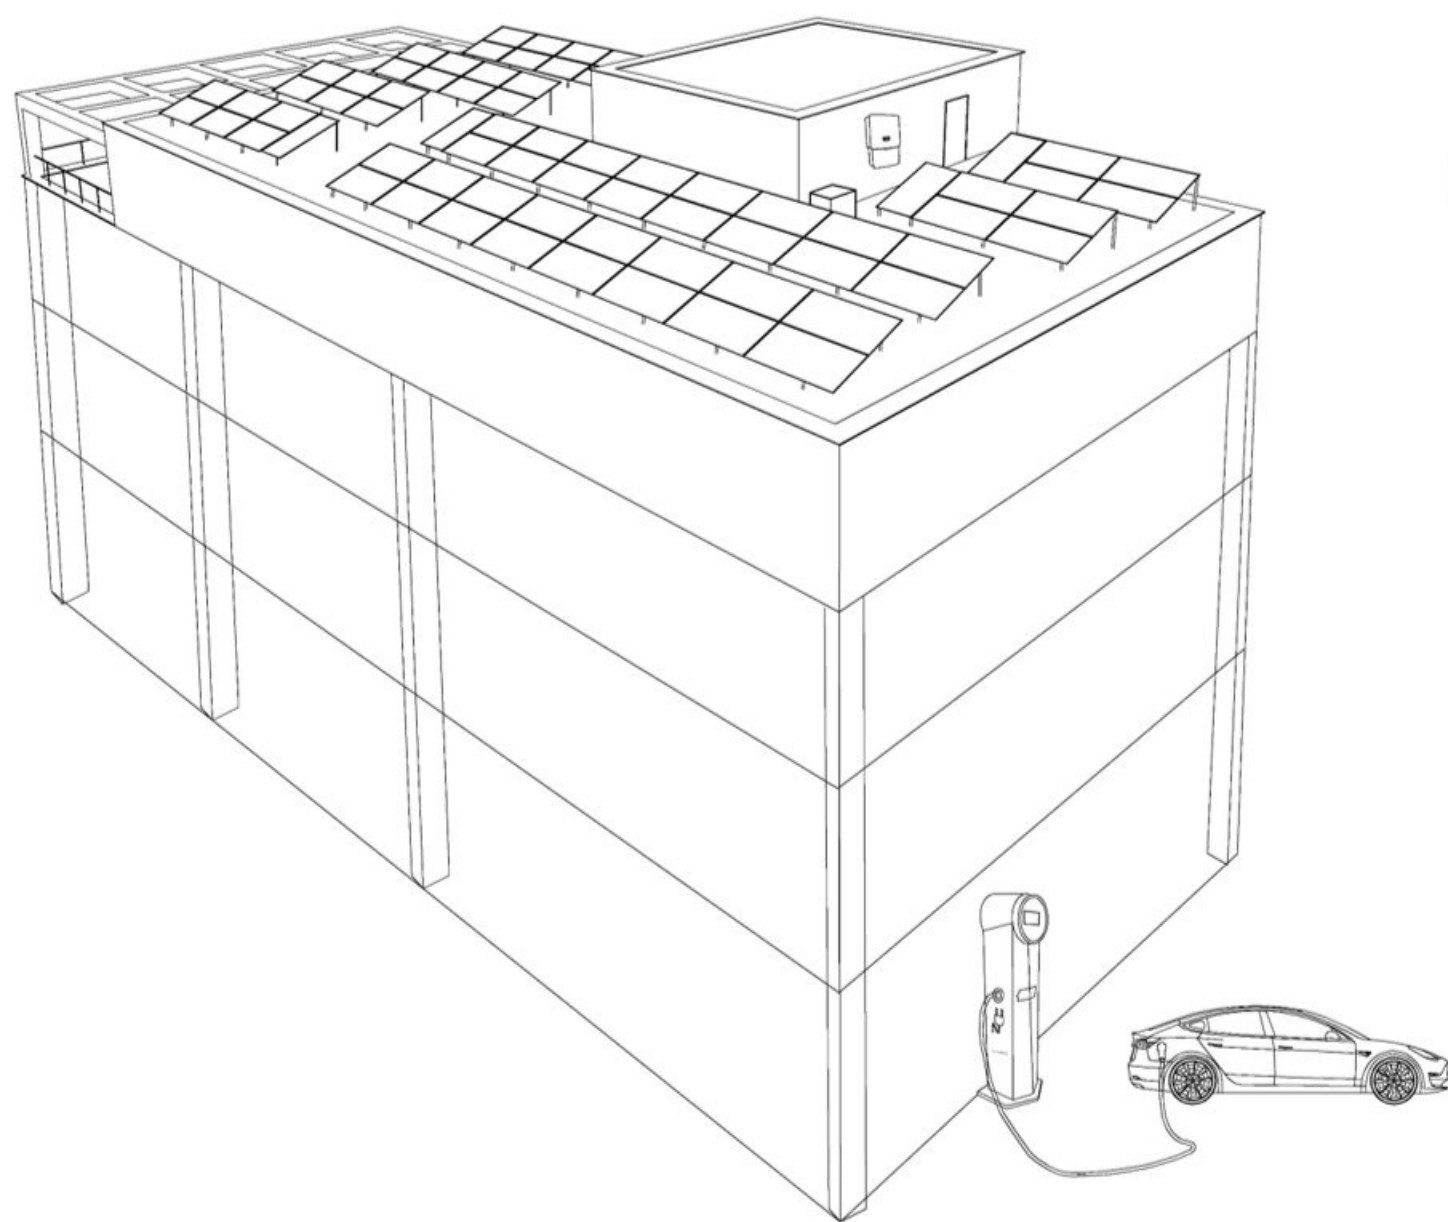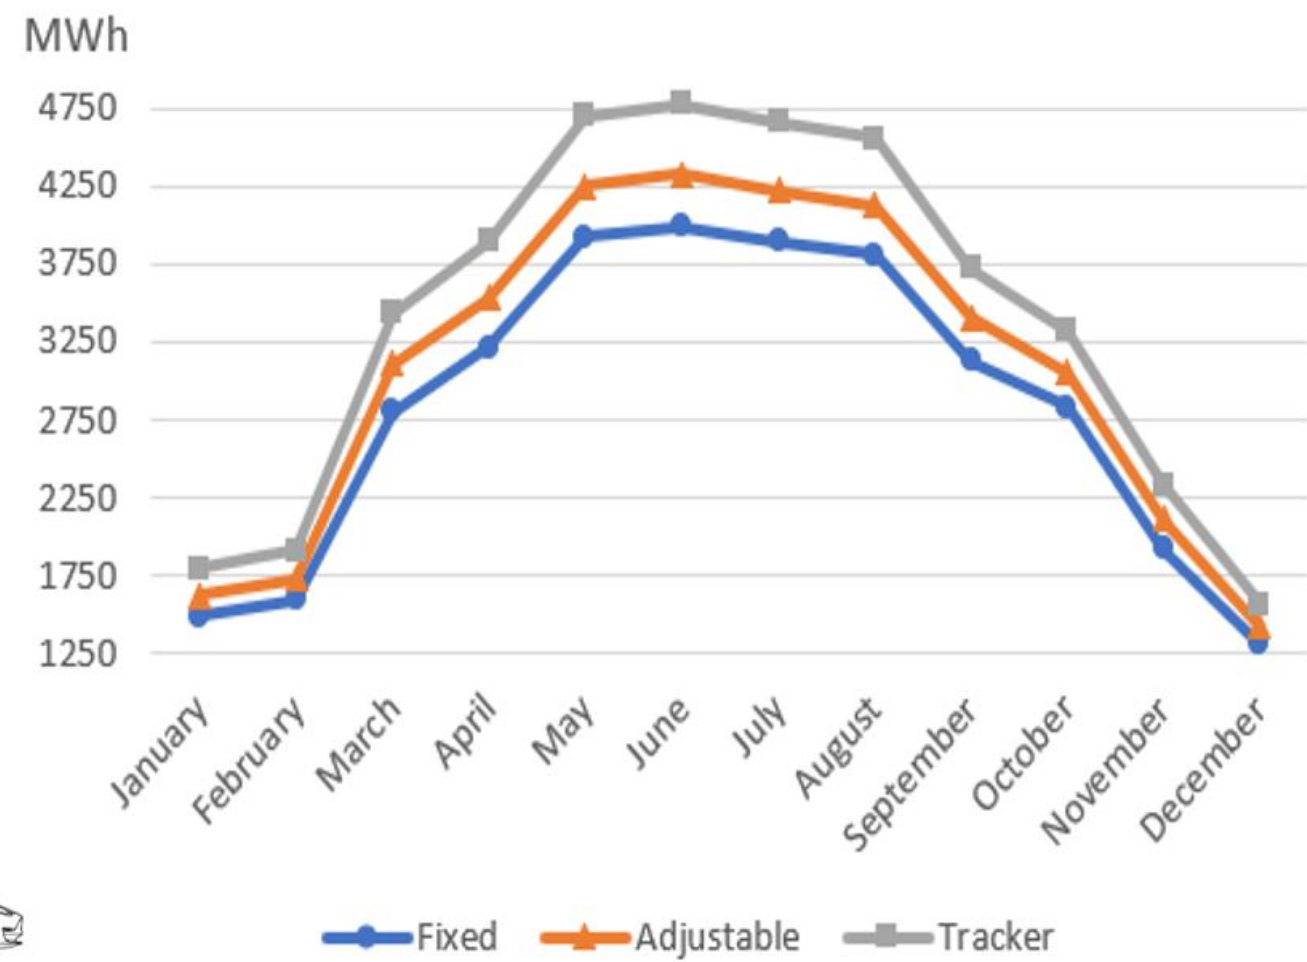

Supplement: f1 [file 6681084.f1.pdf]
